# Supplementary material for: Density functional theory and liquid chromatography-multistage mass spectrometry to characterize raltitrexed photo-degradation mechanisms
Source: Royal Society of Chemistry journal article supplement (doi:10.1039/c6ra13144a), 2016-01-01
Supplement: c6ra13144a1.pdf [file c6ra13144a1.pdf]

## Supporting Information

**Hassane Sadou Yaye<sup>1,2a</sup>, Maher Karoui<sup>1a</sup>, Philippe-Henri Secrétan<sup>1,3</sup>,  
Noureddine Ghermani<sup>4</sup>, Jean-Michel Gillet<sup>5</sup>, Fathi Safta<sup>6</sup>, Najet Yagoubi<sup>1</sup> and  
Bernard Do<sup>1,3\*</sup>**

<sup>1</sup> University of Paris-Sud, Department of Pharmacy, Laboratory "Matériaux et Santé" EA 401, 5 rue Jean Baptiste Clément, 92296 Châtenay-Malabry, France.

<sup>2</sup> Assistance Publique-Hôpitaux de Paris, Groupe Hospitalier Pitié-Salpêtrière, Department of Pharmacy, 47-83 Boulevard de l'Hôpital, 75013 Paris, France.

<sup>3</sup> Assistance Publique-Hôpitaux de Paris, Groupe Hospitalier Henri Mondor, Department of Pharmacy, 1 Avenue du Maréchal de Lattre de Tassigny, 94010 Créteil, France.

<sup>4</sup> University of Paris-Sud, Department of Pharmacy, CNRS UMR 8612 Institut Galien Paris-Sud, LabEx LERMIT, 5, rue Jean Baptiste Clément, 92296 Châtenay-Malabry, France.

<sup>5</sup> University of Paris-Saclay, CNRS UMR 8580, Laboratory "Structures Propriétés et Modélisation des Solides" (SPMS), Grande Voie des Vignes, 92295 Châtenay-Malabry, France.

<sup>6</sup> University of Monastir, Department of Pharmacy, Analytical Chemistry Laboratory, rue Ibn Sina, 5000 Monastir, Tunisia.

<sup>a</sup> The first 2 authors contributed equally to this study and are therefore considered as first authors.

\* Corresponding author. Email: [Bernard.do@u-psud.fr](mailto:Bernard.do@u-psud.fr); Tel: +3362306275.

---

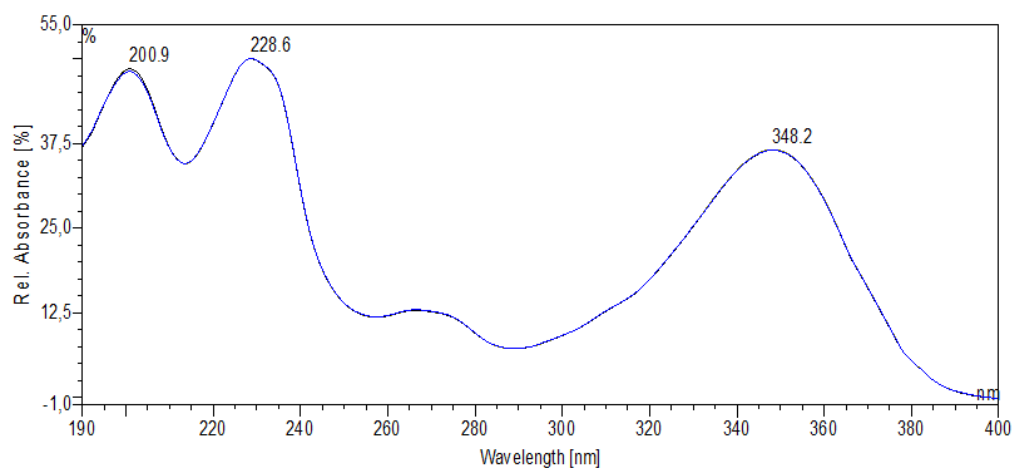

Fig. S1. UV spectrum of 25 µg mL<sup>-1</sup> RALTI in aqueous solution.

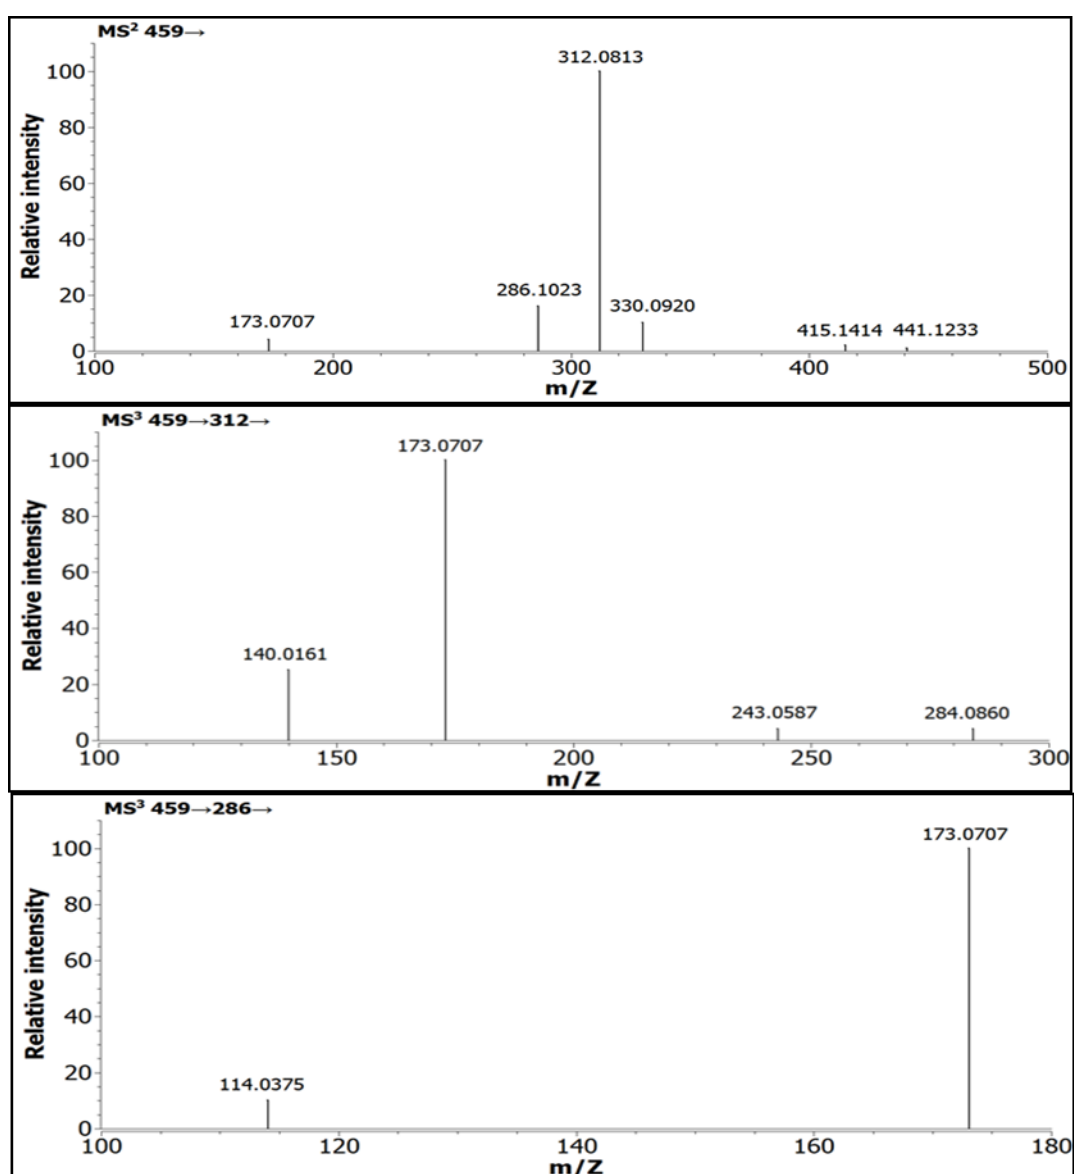

Fig. S2. High-resolution MS<sup>n</sup> mass spectra of protonated RALTI.

**Table S1.** Photoinduced electron and energy transfer reactions and the corresponding evaluating criteria

| Reaction                                                                                                                                                                                                                                                                                                                                                                                                                                                                                                                                                                                                                                                                                                                                                     | Evaluating criteria for spontaneous reactions                                                     |
|--------------------------------------------------------------------------------------------------------------------------------------------------------------------------------------------------------------------------------------------------------------------------------------------------------------------------------------------------------------------------------------------------------------------------------------------------------------------------------------------------------------------------------------------------------------------------------------------------------------------------------------------------------------------------------------------------------------------------------------------------------------|---------------------------------------------------------------------------------------------------|
| <u>Electron transfer</u>                                                                                                                                                                                                                                                                                                                                                                                                                                                                                                                                                                                                                                                                                                                                     |                                                                                                   |
| I. $\text{RALTI}_{\text{S1/T1}} + {}^3\text{O}_2 \rightarrow \text{RALTI}^{\bullet+} + \text{O}_2^{\bullet-}$                                                                                                                                                                                                                                                                                                                                                                                                                                                                                                                                                                                                                                                | $\Delta G_1 = \text{AEA}({}^3\text{O}_2) + \text{VIE}_{\text{S1/T1}} < 0$                         |
| II. $\text{RALTI}_{\text{S1/T1}} + \text{RALTI}_{\text{S0}} \rightarrow \text{RALTI}^{\bullet+} + \text{RALTI}^{\bullet-}$                                                                                                                                                                                                                                                                                                                                                                                                                                                                                                                                                                                                                                   | $\Delta G_2 = \text{VEA}_{\text{S0}} + \text{VIE}_{\text{S1/T1}} < 0$                             |
| III. $\text{RALTI}_{\text{S1/T1}} + \text{RALTI}_{\text{S1/T1}} \rightarrow \text{RALTI}^{\bullet+} + \text{RALTI}^{\bullet-}$                                                                                                                                                                                                                                                                                                                                                                                                                                                                                                                                                                                                                               | $\Delta G_3 = \text{VEA}_{\text{S1/T1}} + \text{VIE}_{\text{S0}} < 0^a$                           |
| IV. $\text{RALTI}^{\bullet-} + {}^3\text{O}_2 \rightarrow \text{RALTI}_{\text{S0}} + \text{O}_2^{\bullet-}$                                                                                                                                                                                                                                                                                                                                                                                                                                                                                                                                                                                                                                                  | $\Delta G_4 = \text{VEA}_{\text{S1/T1}} + \text{VIE}_{\text{S1/T1}} < 0$                          |
|                                                                                                                                                                                                                                                                                                                                                                                                                                                                                                                                                                                                                                                                                                                                                              | $\Delta G_5 = \text{AEA}({}^3\text{O}_2) + \text{VIE}_{\text{S0}}(\text{RALTI}^{\bullet-}) < 0^b$ |
| <u>Energy transfer</u>                                                                                                                                                                                                                                                                                                                                                                                                                                                                                                                                                                                                                                                                                                                                       |                                                                                                   |
| VI. $\text{RALTI}_{\text{S1}} + {}^3\text{O}_2({}^3\Sigma_g^-) \rightarrow \text{RALTI}_{\text{T1}} + {}^1\text{O}_2({}^1\Sigma_g^+)$                                                                                                                                                                                                                                                                                                                                                                                                                                                                                                                                                                                                                        | $E_{\text{S1}} - E_{\text{T1}} > E_{\Sigma}^c$                                                    |
| V. $\text{RALTI}_{\text{S1}} + {}^3\text{O}_2({}^3\Sigma_g^-) \rightarrow \text{RALTI}_{\text{T1}} + {}^1\text{O}_2({}^1\Delta_g)$                                                                                                                                                                                                                                                                                                                                                                                                                                                                                                                                                                                                                           | $E_{\text{S1}} - E_{\text{T1}} > E_{\Delta}^d$                                                    |
| VII. $\text{RALTI}_{\text{T1}} + {}^3\text{O}_2({}^3\Sigma_g^-) \rightarrow \text{RALTI}_{\text{S0}} + {}^1\text{O}_2({}^1\Sigma_g^+)$                                                                                                                                                                                                                                                                                                                                                                                                                                                                                                                                                                                                                       | $E_{\text{T1}} > E_{\Sigma}$                                                                      |
| VIII. $\text{RALTI}_{\text{T1}} + {}^3\text{O}_2({}^3\Sigma_g^-) \rightarrow \text{RALTI}_{\text{S0}} + {}^1\text{O}_2({}^1\Delta_g)$                                                                                                                                                                                                                                                                                                                                                                                                                                                                                                                                                                                                                        | $E_{\text{T1}} > E_{\Delta}$                                                                      |
| <p><sup>a</sup> <math>\Delta G_2</math> and <math>\Delta G_3</math> are for the electron transfer reactions with RALTI as electron acceptor and donor, respectively. <sup>b</sup> <math>\text{VIE}_{\text{S0}}(\text{RALTI}^{\bullet-}) = -\text{VEA}_{\text{S0}}(\text{RALTI})</math>. <sup>c</sup> <math>E_{\text{S1}}</math> and <math>E_{\text{T1}}</math> are the lowest singlet and triplet excitation energies of RALTI, respectively; <math>E_{\Sigma}</math> is the excitation energy of <math>{}^3\text{O}_2({}^3\Sigma_g^-)</math> to <math>{}^1\text{O}_2({}^1\Sigma_g^+)</math>. <sup>d</sup> <math>E_{\Delta}</math> is the excitation energy of <math>{}^3\text{O}_2({}^3\Sigma_g^-)</math> to <math>{}^1\text{O}_2({}^1\Delta_g)</math>.</p> |                                                                                                   |

**Table S2.** Relative retention times (rRTs), accurate masses with errors, elemental compositions and MS<sup>n</sup> product ions of raltitrexed and its photoproducts.

| Compound           | MS <sup>n</sup> mode       | Best possible elemental formula                                              | Accurate mass m/z | Theoretical mass m/z | Relative error (ppm) | Relative Retention time (raltitrexed's retention time : 16.02 min) |
|--------------------|----------------------------|------------------------------------------------------------------------------|-------------------|----------------------|----------------------|--------------------------------------------------------------------|
| <b>Raltitrexed</b> | <b>Precursor ion</b>       | <b>C<sub>21</sub>H<sub>23</sub>N<sub>4</sub>O<sub>6</sub>S<sup>+</sup></b>   | <b>459.1330</b>   | <b>459.1332</b>      | <b>-0.44</b>         | <b>1</b>                                                           |
|                    | MS <sup>2</sup> (459 →)    | C <sub>21</sub> H <sub>21</sub> N <sub>4</sub> O <sub>5</sub> S <sup>+</sup> | 441.1233          | 441.1227             | 1.36                 |                                                                    |
|                    | MS <sup>2</sup> (459 →)    | C <sub>20</sub> H <sub>23</sub> N <sub>4</sub> O <sub>4</sub> S <sup>+</sup> | 415.1414          | 415.1434             | -4.81                |                                                                    |
|                    | MS <sup>2</sup> (459 →)    | C <sub>16</sub> H <sub>16</sub> N <sub>3</sub> O <sub>3</sub> S <sup>+</sup> | 330.0920          | 330.0907             | 3.94                 |                                                                    |
|                    | MS <sup>2</sup> (459 →)    | C <sub>16</sub> H <sub>14</sub> N <sub>3</sub> O <sub>2</sub> S <sup>+</sup> | 312.0813          | 312.0801             | 3.85                 |                                                                    |
|                    | MS <sup>2</sup> (459 →)    | C <sub>15</sub> H <sub>16</sub> N <sub>3</sub> O <sub>3</sub> <sup>+</sup>   | 286.1023          | 286.1009             | 4.89                 |                                                                    |
|                    | MS <sup>2</sup> (459 →)    | C <sub>10</sub> H <sub>9</sub> N <sub>2</sub> O <sup>+</sup>                 | 173.0707          | 173.0709             | -1.16                |                                                                    |
|                    | MS <sup>3</sup> (459→312→) | C <sub>15</sub> H <sub>14</sub> N <sub>3</sub> O <sub>3</sub> <sup>+</sup>   | 284.0860          | 284.0852             | 2.82                 |                                                                    |
|                    | MS <sup>3</sup> (459→312→) | C <sub>13</sub> H <sub>11</sub> N <sub>2</sub> O <sub>3</sub> <sup>+</sup>   | 243.0592          | 243.0587             | 2.06                 |                                                                    |
|                    | MS <sup>3</sup> (459→312→) | C <sub>10</sub> H <sub>9</sub> N <sub>2</sub> O <sup>+</sup>                 | 173.0707          | 173.0709             | -1.16                |                                                                    |
|                    | MS <sup>3</sup> (459→312→) | C <sub>6</sub> H <sub>6</sub> NOS <sup>+</sup>                               | 140.0161          | 140.0164             | -2.14                |                                                                    |
|                    | MS <sup>3</sup> (459→286→) | C <sub>10</sub> H <sub>9</sub> N <sub>2</sub> O <sup>+</sup>                 | 173.0707          | 173.0709             | -1.16                |                                                                    |
|                    | MS <sup>3</sup> (459→286→) | C <sub>5</sub> H <sub>8</sub> NS <sup>+</sup>                                | 114.0375          | 114.0372             | 2.63                 |                                                                    |
| <b>P-1</b>         | <b>Precursor ion</b>       | <b>C<sub>11</sub>H<sub>14</sub>N<sub>3</sub>O<sup>+</sup></b>                | <b>204.1132</b>   | <b>204.1131</b>      | <b>0.49</b>          | <b>0.167</b>                                                       |
|                    | MS <sup>2</sup> (204 →)    | C <sub>10</sub> H <sub>9</sub> N <sub>2</sub> O <sup>+</sup>                 | 173.0709          | 173.0709             | 0.00                 |                                                                    |
|                    | MS <sup>2</sup> (204 →)    | C <sub>8</sub> H <sub>6</sub> NO <sup>+</sup>                                | 132.0446          | 132.0443             | 2.27                 |                                                                    |
| <b>P-2</b>         | <b>Precursor ion</b>       | <b>C<sub>10</sub>H<sub>11</sub>N<sub>2</sub>O<sub>2</sub><sup>+</sup></b>    | <b>191.0817</b>   | <b>191.0815</b>      | <b>1.05</b>          | <b>0.169</b>                                                       |
|                    | MS <sup>2</sup> (191 →)    | C <sub>10</sub> H <sub>9</sub> N <sub>2</sub> O <sup>+</sup>                 | 173.0705          | 173.0709             | -2.31                |                                                                    |
|                    | MS <sup>2</sup> (191 →)    | C <sub>9</sub> H <sub>9</sub> N <sub>2</sub> O <sup>+</sup>                  | 161.0710          | 161.0709             | 0.62                 |                                                                    |
|                    | MS <sup>2</sup> (191 →)    | C <sub>8</sub> H <sub>6</sub> NO <sup>+</sup>                                | 132.0446          | 132.0443             | 2.27                 |                                                                    |
| <b>P-3</b>         | <b>Precursor ion</b>       | <b>C<sub>15</sub>H<sub>16</sub>N<sub>3</sub>O<sub>4</sub><sup>+</sup></b>    | <b>302.1144</b>   | <b>302.1135</b>      | <b>2.98</b>          | <b>0.257</b>                                                       |
|                    | MS <sup>2</sup> (302 →)    | C <sub>15</sub> H <sub>14</sub> N <sub>3</sub> O <sub>3</sub> <sup>+</sup>   | 284.1036          | 284.1029             | 2.46                 |                                                                    |
|                    | MS <sup>2</sup> (302 →)    | C <sub>14</sub> H <sub>11</sub> N <sub>2</sub> O <sub>4</sub> <sup>+</sup>   | 271.0717          | 271.0713             | 1.48                 |                                                                    |
|                    | MS <sup>2</sup> (302 →)    | C <sub>14</sub> H <sub>16</sub> N <sub>3</sub> O <sub>2</sub> <sup>+</sup>   | 258.1239          | 258.1237             | 0.77                 |                                                                    |
|                    | MS <sup>2</sup> (302 →)    | C <sub>14</sub> H <sub>9</sub> N <sub>2</sub> O <sub>3</sub> <sup>+</sup>    | 253.0611          | 253.0607             | 1.58                 |                                                                    |
|                    | MS <sup>2</sup> (302 →)    | C <sub>13</sub> H <sub>11</sub> N <sub>2</sub> O <sub>2</sub> <sup>+</sup>   | 227.0818          | 227.0815             | 1.32                 |                                                                    |
|                    | MS <sup>2</sup> (302 →)    | C <sub>10</sub> H <sub>7</sub> N <sub>2</sub> O <sub>2</sub> <sup>+</sup>    | 187.0511          | 187.0520             | -4.80                |                                                                    |
|                    | MS <sup>2</sup> (302 →)    | C <sub>9</sub> H <sub>9</sub> N <sub>2</sub> O <sup>+</sup>                  | 161.0712          | 161.0709             | 1.86                 |                                                                    |
|                    | MS <sup>2</sup> (302 →)    | C <sub>6</sub> H <sub>8</sub> NO <sub>3</sub> <sup>+</sup>                   | 142.0501          | 142.0498             | 2.11                 |                                                                    |
|                    | MS <sup>3</sup> (302→284→) | C <sub>14</sub> H <sub>14</sub> N <sub>3</sub> O <sub>2</sub> <sup>+</sup>   | 256.1086          | 256.1080             | 2.34                 |                                                                    |
| <b>P-4</b>         | <b>Precursor ion</b>       | <b>C<sub>14</sub>H<sub>16</sub>N<sub>3</sub>O<sub>4</sub><sup>+</sup></b>    | <b>290.1142</b>   | <b>290.1135</b>      | <b>2.41</b>          | <b>0.288</b>                                                       |
|                    | MS <sup>2</sup> (290 →)    | C <sub>13</sub> H <sub>16</sub> N <sub>3</sub> O <sub>2</sub> <sup>+</sup>   | 246.1241          | 246.1237             | 1.63                 |                                                                    |

|            |                               |                                                                                            |                 |                 |              |              |
|------------|-------------------------------|--------------------------------------------------------------------------------------------|-----------------|-----------------|--------------|--------------|
|            | MS <sup>2</sup> (290 →)       | C <sub>10</sub> H <sub>9</sub> N <sub>2</sub> O <sub>2</sub> <sup>+</sup>                  | 189.0662        | 189.0658        | 2.12         |              |
|            | MS <sup>2</sup> (290 →)       | C <sub>10</sub> H <sub>9</sub> N <sub>2</sub> O <sup>+</sup>                               | 173.0712        | 173.0709        | 1.73         |              |
|            | MS <sup>3</sup> (290 → 246 →) | C <sub>12</sub> H <sub>11</sub> N <sub>2</sub> O <sub>2</sub> <sup>+</sup>                 | 215.0820        | 215.0815        | 2.32         |              |
|            | MS <sup>3</sup> (290 → 246 →) | C <sub>11</sub> H <sub>11</sub> N <sub>2</sub> O <sup>+</sup>                              | 187.0872        | 187.0866        | 3.21         |              |
|            | MS <sup>3</sup> (290 → 246 →) | C <sub>10</sub> H <sub>9</sub> N <sub>2</sub> O <sup>+</sup>                               | 173.0712        | 173.0709        | 1.73         |              |
|            | MS <sup>3</sup> (290 → 246 →) | C <sub>9</sub> H <sub>9</sub> N <sub>2</sub> O <sup>+</sup>                                | 161.0717        | 161.0709        | 4.97         |              |
| <b>P-5</b> | <b>Precursor ion</b>          | <b>C<sub>10</sub>H<sub>9</sub>N<sub>2</sub>O<sub>3</sub><sup>+</sup></b>                   | <b>205.0604</b> | <b>205.0608</b> | <b>-1.95</b> | <b>0.477</b> |
|            | MS <sup>2</sup> (205 →)       | C <sub>10</sub> H <sub>6</sub> NO <sub>3</sub> <sup>+</sup>                                | 188.0348        | 188.0342        | 3.19         |              |
|            | MS <sup>2</sup> (205 →)       | C <sub>8</sub> H <sub>6</sub> NO <sub>3</sub> <sup>+</sup>                                 | 164.0345        | 164.0342        | 1.83         |              |
|            | MS <sup>2</sup> (205 →)       | C <sub>9</sub> H <sub>9</sub> N <sub>2</sub> O <sup>+</sup>                                | 161.0714        | 161.0709        | 3.10         |              |
|            | MS <sup>2</sup> (205 →)       | C <sub>8</sub> H <sub>4</sub> NO <sub>2</sub> <sup>+</sup>                                 | 146.0231        | 146.0236        | -3.42        |              |
| <b>P-6</b> | <b>Precursor ion</b>          | <b>C<sub>10</sub>H<sub>9</sub>N<sub>2</sub>O<sub>2</sub><sup>+</sup></b>                   | <b>189.0654</b> | <b>189.0658</b> | <b>-2.12</b> | <b>0.667</b> |
|            | MS <sup>2</sup> (189 →)       | C <sub>9</sub> H <sub>9</sub> N <sub>2</sub> O <sup>+</sup>                                | 161.0714        | 161.0709        | 3.10         |              |
|            | MS <sup>2</sup> (189 →)       | C <sub>8</sub> H <sub>6</sub> NO <sub>2</sub> <sup>+</sup>                                 | 148.0397        | 148.0393        | 2.70         |              |
| <b>P-7</b> | <b>Precursor ion</b>          | <b>C<sub>21</sub>H<sub>23</sub>O<sub>8</sub>N<sub>4</sub>S<sup>+</sup></b>                 | <b>491.1228</b> | <b>491.1231</b> | <b>-0.61</b> | <b>0.692</b> |
|            | MS <sup>2</sup> (491 →)       | C <sub>21</sub> H <sub>21</sub> N <sub>4</sub> O <sub>7</sub> S <sup>+</sup>               | 473.1134        | 473.1126        | 1.69         |              |
|            | MS <sup>2</sup> (491 →)       | C <sub>20</sub> H <sub>21</sub> N <sub>4</sub> O <sub>6</sub> S <sup>+</sup>               | 445.1162        | 445.1176        | -3.15        |              |
|            | MS <sup>2</sup> (491 →)       | C <sub>20</sub> H <sub>19</sub> N <sub>4</sub> O <sub>5</sub> S <sup>+</sup>               | 427.1084        | 427.1071        | 3.04         |              |
|            | MS <sup>2</sup> (491 →)       | C <sub>15</sub> H <sub>14</sub> N <sub>3</sub> O <sub>3</sub> S <sup>+</sup>               | 316.0762        | 316.0750        | 3.80         |              |
|            | MS <sup>2</sup> (491 →)       | C <sub>11</sub> H <sub>12</sub> N <sub>3</sub> O <sup>+</sup>                              | 202.0975        | 202.0974        | 0.49         |              |
|            | MS <sup>2</sup> (491 →)       | C <sub>10</sub> H <sub>9</sub> N <sub>2</sub> O <sup>+</sup>                               | 173.0706        | 173.0709        | -1.73        |              |
|            | MS <sup>3</sup> (491 → 473 →) | C <sub>20</sub> H <sub>21</sub> N <sub>4</sub> O <sub>6</sub> S <sup>+</sup>               | 445.1182        | 445.1176        | 1.35         |              |
|            | MS <sup>3</sup> (491 → 473 →) | C <sub>20</sub> H <sub>19</sub> N <sub>4</sub> O <sub>5</sub> S <sup>+</sup>               | 427.1079        | 427.1070        | 2.11         |              |
|            | MS <sup>3</sup> (491 → 473 →) | C <sub>16</sub> H <sub>14</sub> N <sub>3</sub> O <sub>4</sub> S <sup>+</sup>               | 344.0699        | 344.0699        | 0.00         |              |
|            | MS <sup>3</sup> (491 → 473 →) | C <sub>16</sub> H <sub>12</sub> N <sub>3</sub> O <sub>3</sub> S <sup>+</sup>               | 326.0617        | 326.0594        | -0.30        |              |
|            | MS <sup>3</sup> (491 → 473 →) | C <sub>15</sub> H <sub>12</sub> N <sub>3</sub> O <sub>2</sub> <sup>+</sup>                 | 266.0928        | 266.0924        | 1.50         |              |
|            | MS <sup>3</sup> (491 → 473 →) | C <sub>14</sub> H <sub>14</sub> N <sub>3</sub> O <sup>+</sup>                              | 240.1134        | 240.1131        | 1.25         |              |
|            | MS <sup>3</sup> (491 → 473 →) | C <sub>10</sub> H <sub>9</sub> N <sub>2</sub> O <sup>+</sup>                               | 173.0706        | 173.0709        | -1.73        |              |
|            | MS <sup>3</sup> (491 → 316 →) | C <sub>14</sub> H <sub>14</sub> N <sub>3</sub> O <sub>2</sub> <sup>+</sup>                 | 256.1086        | 256.1080        | 2.34         |              |
| <b>P-8</b> | <b>Precursor ion</b>          | <b>C<sub>22</sub>H<sub>23</sub>N<sub>2</sub>O<sub>6</sub>S<sup>+</sup></b>                 | <b>471.1321</b> | <b>471.1323</b> | <b>-0.42</b> | <b>0.840</b> |
|            | MS <sup>2</sup> (471 →)       | C <sub>17</sub> H <sub>16</sub> N <sub>3</sub> O <sub>3</sub> S <sup>+</sup>               | 342.0918        | 342.0907        | 3.22         |              |
|            | MS <sup>2</sup> (471 →)       | C <sub>17</sub> H <sub>14</sub> N <sub>3</sub> O <sub>2</sub> S <sup>+</sup>               | 324.0814        | 324.0801        | 4.01         |              |
|            | MS <sup>2</sup> (471 →)       | C <sub>12</sub> H <sub>15</sub> N <sub>2</sub> O <sub>5</sub> S <sup>+</sup>               | 299.0707        | 299.0696        | 3.68         |              |
|            | MS <sup>3</sup> (471 → 342 →) | C <sub>16</sub> H <sub>16</sub> N <sub>3</sub> OS <sup>+</sup>                             | 298.1018        | 298.1008        | 3.35         |              |
| <b>P-9</b> | <b>Precursor ion</b>          | <b>C<sub>42</sub>H<sub>44</sub>N<sub>8</sub>O<sub>12</sub>S<sub>2</sub><sup>2+</sup></b>   | <b>458.1250</b> | <b>458.1255</b> | <b>-1.09</b> | <b>0.843</b> |
|            | MS <sup>2</sup> (458 →)       | C <sub>32</sub> H <sub>35</sub> N <sub>6</sub> O <sub>11</sub> S <sub>2</sub> <sup>+</sup> | 743.1833        | 743.1799        | 4.57         |              |
|            | MS <sup>2</sup> (458 →)       | C <sub>37</sub> H <sub>37</sub> N <sub>7</sub> O <sub>9</sub> S <sub>2</sub> <sup>2+</sup> | 393.6040        | 393.6042        | -0.41        |              |
|            | MS <sup>2</sup> (458 →)       | C <sub>36</sub> H <sub>37</sub> N <sub>7</sub> O <sub>7</sub> S <sub>2</sub> <sup>2+</sup> | 371.6105        | 371.6093        | 3.36         |              |
|            | MS <sup>3</sup> (458 → 743 →) | C <sub>27</sub> H <sub>26</sub> N <sub>5</sub> O <sub>7</sub> S <sub>2</sub> <sup>+</sup>  | 596.1290        | 596.1268        | 3.69         |              |

|                             |                                                              |                                                                                            |                 |                 |              |              |
|-----------------------------|--------------------------------------------------------------|--------------------------------------------------------------------------------------------|-----------------|-----------------|--------------|--------------|
|                             | MS <sup>3</sup> (458 →743→)                                  | C <sub>22</sub> H <sub>19</sub> N <sub>4</sub> O <sub>4</sub> S <sub>2</sub> <sup>+</sup>  | 467.0838        | 467.0842        | -0.85        |              |
|                             | MS <sup>3</sup> (458 →743→)                                  | C <sub>21</sub> H <sub>19</sub> N <sub>4</sub> O <sub>2</sub> S <sub>2</sub> <sup>+</sup>  | 423.0956        | 423.0944        | 2.84         |              |
|                             | MS <sup>3</sup> (458 →743→)                                  | C <sub>16</sub> H <sub>12</sub> N <sub>3</sub> O <sub>2</sub> S <sup>+</sup>               | 310.0660        | 310.0645        | 4.93         |              |
|                             | MS <sup>3</sup> (458 →371→)                                  | C <sub>36</sub> H <sub>35</sub> N <sub>7</sub> O <sub>6</sub> S <sub>2</sub> <sup>2+</sup> | 362.6044        | 362.6040        | 1.21         |              |
|                             | MS <sup>3</sup> (458 →371→)                                  | C <sub>31</sub> H <sub>28</sub> N <sub>6</sub> O <sub>3</sub> S <sub>2</sub> <sup>2+</sup> | 298.0837        | 298.0827        | 3.46         |              |
|                             | MS <sup>3</sup> (458 →371→)                                  | C <sub>15</sub> H <sub>15</sub> N <sub>3</sub> OS <sup>++</sup>                            | 285.0944        | 285.0930        | 4.81         |              |
|                             | MS <sup>3</sup> (458 →371→)                                  | C <sub>10</sub> H <sub>9</sub> N <sub>2</sub> O <sup>+</sup>                               | 173.0713        | 173.0709        | 2.08         |              |
| <b>P-10</b>                 | <b>Precursor ion</b>                                         | <b>C<sub>20</sub>H<sub>23</sub>O<sub>5</sub>N<sub>4</sub>S<sup>+</sup></b>                 | <b>431.1380</b> | <b>431.1384</b> | <b>-0.93</b> | <b>0.848</b> |
|                             | MS <sup>2</sup> (431 →)                                      | C <sub>20</sub> H <sub>21</sub> N <sub>4</sub> O <sub>4</sub> S <sup>+</sup>               | 413.1271        | 413.1278        | -1.69        |              |
|                             | MS <sup>2</sup> (431 →)                                      | C <sub>20</sub> H <sub>21</sub> N <sub>4</sub> O <sub>5</sub> <sup>+</sup>                 | 397.1518        | 397.1507        | 2.77         |              |
|                             | MS <sup>2</sup> (431 →)                                      | C <sub>16</sub> H <sub>16</sub> O <sub>3</sub> N <sub>3</sub> S <sup>+</sup>               | 330.0914        | 330.0906        | 2.42         |              |
|                             | MS <sup>2</sup> (431 →)                                      | C <sub>15</sub> H <sub>16</sub> O <sub>2</sub> N <sub>3</sub> S <sup>+</sup>               | 302.0969        | 302.0958        | 3.64         |              |
|                             | MS <sup>3</sup> (431 →330→)                                  | C <sub>16</sub> H <sub>14</sub> N <sub>3</sub> O <sub>2</sub> S <sup>+</sup>               | 312.0809        | 312.0801        | 2.56         |              |
|                             | MS <sup>3</sup> (431 →330→)                                  | C <sub>15</sub> H <sub>16</sub> O <sub>2</sub> N <sub>3</sub> S <sup>+</sup>               | 302.0966        | 302.0958        | 2.65         |              |
|                             | MS <sup>3</sup> (431 →330→)                                  | C <sub>16</sub> H <sub>14</sub> N <sub>3</sub> O <sub>3</sub> <sup>+</sup>                 | 296.1035        | 296.1030        | 1.68         |              |
|                             | MS <sup>3</sup> (431 →302→)                                  | C <sub>15</sub> H <sub>14</sub> N <sub>3</sub> OS <sup>+</sup>                             | 284.0857        | 284.0852        | 1.76         |              |
|                             | MS <sup>3</sup> (431 →302→)                                  | C <sub>14</sub> H <sub>11</sub> O <sub>2</sub> N <sub>2</sub> S <sup>+</sup>               | 271.0536        | 271.0536        | 0.00         |              |
|                             | MS <sup>3</sup> (431 →302→)                                  | C <sub>15</sub> H <sub>14</sub> N <sub>3</sub> O <sub>2</sub> <sup>+</sup>                 | 268.1079        | 268.1081        | -0.75        |              |
|                             | MS <sup>3</sup> (431 →302→)                                  | C <sub>13</sub> H <sub>11</sub> N <sub>2</sub> OS <sup>+</sup>                             | 243.0587        | 243.0586        | 0.41         |              |
|                             | MS <sup>3</sup> (431 →302→)                                  | C <sub>13</sub> H <sub>11</sub> N <sub>2</sub> O <sup>+</sup>                              | 211.0866        | 211.0865        | 0.47         |              |
|                             | MS <sup>3</sup> (431 →302→)                                  | C <sub>11</sub> H <sub>12</sub> ON <sub>3</sub> <sup>+</sup>                               | 202.0982        | 202.0975        | 3.46         |              |
|                             | MS <sup>3</sup> (431 →302→)                                  | C <sub>9</sub> H <sub>10</sub> O <sub>2</sub> N <sub>2</sub> <sup>+</sup>                  | 189.0665        | 189.0659        | 3.17         |              |
| MS <sup>3</sup> (431 →302→) | C <sub>10</sub> H <sub>9</sub> N <sub>2</sub> O <sup>+</sup> | 173.0710                                                                                   | 173.0709        | 0.58            |              |              |
| <b>P-11</b>                 | <b>Precursor ion</b>                                         | <b>C<sub>20</sub>H<sub>21</sub>O<sub>6</sub>N<sub>4</sub>S<sup>+</sup></b>                 | <b>445.1174</b> | <b>445.1176</b> | <b>-0.45</b> | <b>0.864</b> |
|                             | MS <sup>2</sup> (445 →)                                      | C <sub>20</sub> H <sub>19</sub> N <sub>4</sub> O <sub>5</sub> S <sup>+</sup>               | 427.1083        | 427.1071        | 2.81         |              |
|                             | MS <sup>2</sup> (445 →)                                      | C <sub>16</sub> H <sub>14</sub> N <sub>3</sub> O <sub>4</sub> S <sup>+</sup>               | 344.0709        | 344.0699        | 2.91         |              |
|                             | MS <sup>2</sup> (445 →)                                      | C <sub>15</sub> H <sub>14</sub> N <sub>3</sub> O <sub>3</sub> S <sup>+</sup>               | 316.0761        | 316.0750        | 3.48         |              |
|                             | MS <sup>2</sup> (445 →)                                      | C <sub>11</sub> H <sub>12</sub> N <sub>3</sub> O <sup>+</sup>                              | 202.0984        | 202.0975        | 4.45         |              |
|                             | MS <sup>3</sup> (445 →427→)                                  | C <sub>14</sub> H <sub>14</sub> N <sub>3</sub> O <sup>+</sup>                              | 240.1134        | 240.1131        | 1.25         |              |
|                             | MS <sup>3</sup> (445 →316→)                                  | C <sub>14</sub> H <sub>14</sub> N <sub>3</sub> O <sub>2</sub> <sup>+</sup>                 | 256.1086        | 256.1081        | 1.95         |              |
| <b>P-12</b>                 | <b>Precursor ion</b>                                         | <b>C<sub>21</sub>H<sub>23</sub>O<sub>7</sub>N<sub>4</sub>S<sup>+</sup></b>                 | <b>475.1275</b> | <b>475.1282</b> | <b>-1.47</b> | <b>0.895</b> |
|                             | MS <sup>2</sup> (475 →)                                      | C <sub>19</sub> H <sub>20</sub> N <sub>3</sub> O <sub>7</sub> <sup>+</sup>                 | 402.1306        | 402.1296        | 2.49         |              |
|                             | MS <sup>2</sup> (475 →)                                      | C <sub>16</sub> H <sub>14</sub> N <sub>3</sub> O <sub>3</sub> S <sup>+</sup>               | 328.0760        | 328.0750        | 3.05         |              |
|                             | MS <sup>2</sup> (475 →)                                      | C <sub>16</sub> H <sub>12</sub> N <sub>3</sub> O <sub>2</sub> S <sup>+</sup>               | 310.0658        | 310.0645        | 4.19         |              |
|                             | MS <sup>2</sup> (475 →)                                      | C <sub>11</sub> H <sub>15</sub> N <sub>2</sub> O <sub>5</sub> S <sup>+</sup>               | 287.0710        | 287.0696        | 4.88         |              |
|                             | MS <sup>2</sup> (475 →)                                      | C <sub>11</sub> H <sub>12</sub> N <sub>3</sub> O <sub>2</sub> <sup>+</sup>                 | 218.0919        | 218.0924        | -2.29        |              |
|                             | MS <sup>2</sup> (475 →)                                      | C <sub>10</sub> H <sub>9</sub> N <sub>2</sub> O <sub>2</sub> <sup>+</sup>                  | 189.0667        | 189.0658        | 4.76         |              |
|                             | MS <sup>2</sup> (475 →)                                      | C <sub>6</sub> H <sub>6</sub> NOS <sup>+</sup>                                             | 140.0171        | 140.0165        | 4.29         |              |
| <b>P-13</b>                 | <b>Precursor ion</b>                                         | <b>C<sub>21</sub>H<sub>23</sub>O<sub>7</sub>N<sub>4</sub>S<sup>+</sup></b>                 | <b>475.1278</b> | <b>475.1282</b> | <b>-0.84</b> | <b>0.958</b> |

|             |                             |                                                                                            |                 |                 |              |              |
|-------------|-----------------------------|--------------------------------------------------------------------------------------------|-----------------|-----------------|--------------|--------------|
|             | MS <sup>2</sup> (475 →)     | C <sub>16</sub> H <sub>14</sub> N <sub>3</sub> O <sub>3</sub> S <sup>+</sup>               | 328.0758        | 328.0750        | 2.44         |              |
|             | MS <sup>2</sup> (475 →)     | C <sub>16</sub> H <sub>12</sub> N <sub>3</sub> O <sub>2</sub> S <sup>+</sup>               | 310.0652        | 310.0645        | 2.26         |              |
|             | MS <sup>2</sup> (475 →)     | C <sub>11</sub> H <sub>12</sub> N <sub>3</sub> O <sub>2</sub> <sup>+</sup>                 | 218.0919        | 218.0924        | -2.29        |              |
|             | MS <sup>2</sup> (475 →)     | C <sub>10</sub> H <sub>9</sub> N <sub>2</sub> O <sup>+</sup>                               | 173.0703        | 173.0709        | -3.47        |              |
| <b>P-14</b> | <b>Precursor ion</b>        | <b>C<sub>20</sub>H<sub>21</sub>N<sub>4</sub>O<sub>5</sub>S<sup>+</sup></b>                 | <b>429.1222</b> | <b>429.1227</b> | <b>-1.17</b> | <b>1.099</b> |
|             | MS <sup>2</sup> (429 →)     | C <sub>16</sub> H <sub>16</sub> N <sub>3</sub> O <sub>3</sub> S <sup>+</sup>               | 330.0914        | 330.0906        | 2.42         |              |
|             | MS <sup>2</sup> (429 →)     | C <sub>16</sub> H <sub>14</sub> N <sub>3</sub> O <sub>2</sub> S <sup>+</sup>               | 312.0803        | 312.0801        | 0.64         |              |
|             | MS <sup>2</sup> (429 →)     | C <sub>15</sub> H <sub>16</sub> N <sub>3</sub> O <sub>3</sub> S <sup>+</sup>               | 286.1003        | 286.1008        | -1.75        |              |
|             | MS <sup>2</sup> (429 →)     | C <sub>10</sub> H <sub>9</sub> N <sub>2</sub> O <sup>+</sup>                               | 173.0704        | 173.0709        | -2.88        |              |
| <b>P-15</b> | <b>Precursor ion</b>        | <b>C<sub>43</sub>H<sub>46</sub>N<sub>8</sub>O<sub>12</sub>S<sub>2</sub><sup>2+</sup></b>   | <b>465.1329</b> | <b>465.1333</b> | <b>-0.82</b> | <b>1.542</b> |
|             | MS <sup>2</sup> (465 →)     | C <sub>38</sub> H <sub>36</sub> N <sub>7</sub> O <sub>8</sub> S <sub>2</sub> <sup>+</sup>  | 782.2074        | 782.2061        | 1.62         |              |
|             | MS <sup>2</sup> (465 →)     | C <sub>33</sub> H <sub>37</sub> N <sub>6</sub> O <sub>11</sub> S <sub>2</sub> <sup>+</sup> | 757.1971        | 757.1956        | 1.98         |              |
|             | MS <sup>2</sup> (465 →)     | C <sub>22</sub> H <sub>23</sub> N <sub>4</sub> O <sub>6</sub> S <sup>+</sup>               | 471.1348        | 471.1333        | 3.23         |              |
|             | MS <sup>2</sup> (465 →)     | C <sub>10</sub> H <sub>9</sub> N <sub>2</sub> O <sup>+</sup>                               | 173.0713        | 173.0709        | 2.08         |              |
|             | MS <sup>2</sup> (465 →)     | C <sub>5</sub> H <sub>10</sub> NO <sub>4</sub> <sup>+</sup>                                | 148.0610        | 148.0604        | 3.85         |              |
|             | MS <sup>3</sup> (465 →757→) | C <sub>22</sub> H <sub>23</sub> N <sub>4</sub> O <sub>6</sub> S <sup>+</sup>               | 471.1354        | 471.1333        | 4.50         |              |
|             | MS <sup>3</sup> (465 →757→) | C <sub>21</sub> H <sub>23</sub> N <sub>4</sub> O <sub>6</sub> S <sup>+</sup>               | 459.1348        | 459.1333        | 3.31         |              |
|             | MS <sup>3</sup> (465 →757→) | C <sub>16</sub> H <sub>14</sub> N <sub>3</sub> O <sub>2</sub> S <sup>+</sup>               | 312.0801        | 312.0801        | -0.06        |              |
